# Supplementary material for: Potential use of Folate-appended Methyl-β-Cyclodextrin as an Anticancer Agent
Source: PubMed Central journal article supplement — Sci Rep. 2013 Jan 22;3:1104. doi: 10.1038/srep01104 (PMC3551233; doi:10.1038/srep01104), 2013-01-22
Supplement: srep01104-s1.pdf [file srep01104-s1.pdf]

Supplementary information

Potential use of Folate-appended Methyl- $\beta$ -Cyclodextrin as an Anticancer Agent

Risako Onodera, Keiichi Motoyama, Ayaka Okamatsu, Taishi Higashi and Hidetoshi Arima

Graduate School of Pharmaceutical Sciences, Kumamoto University, 5-1 Oe-honmachi, Chuo-ku, Kumamoto 862-0973, Japan.

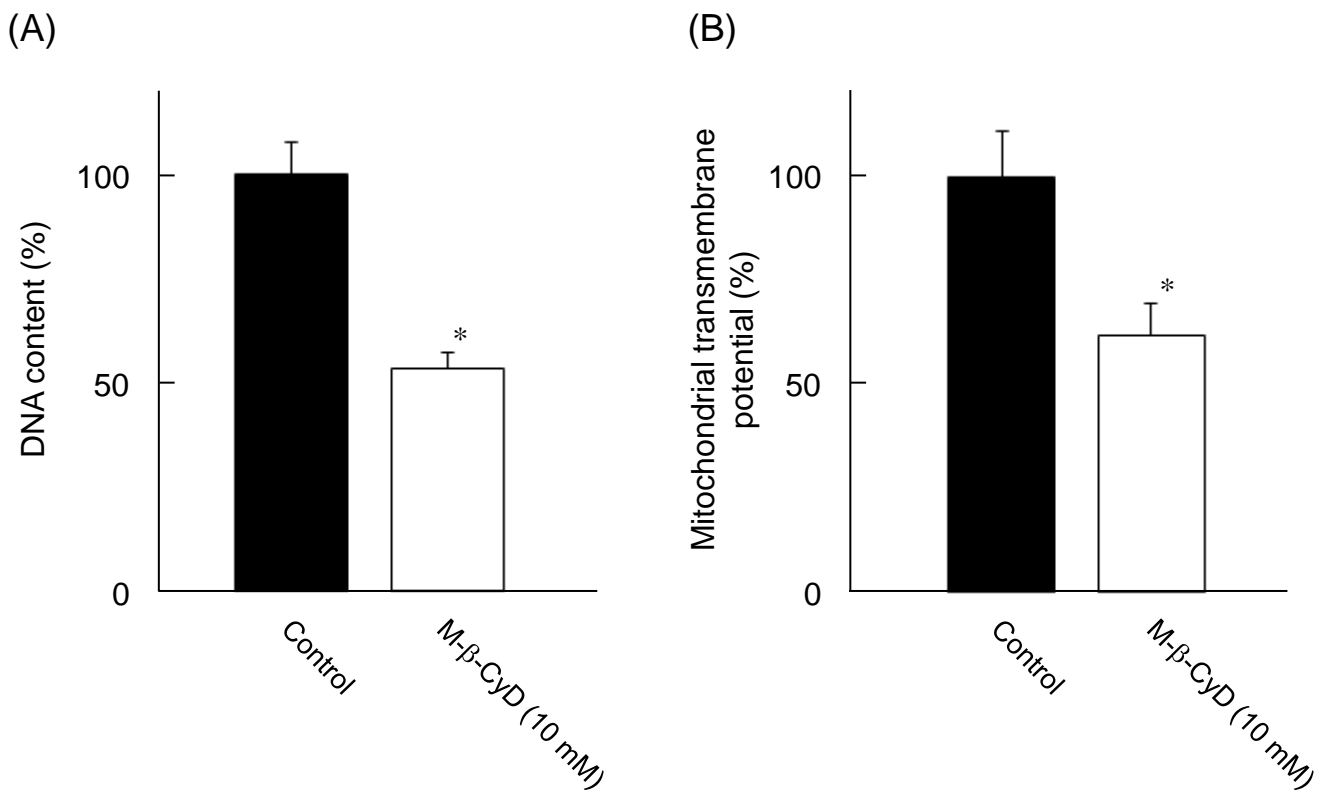

Supplementary Figure 1. DNA content (A) and mitochondrial transmembrane potential (B) in the presence of M-β-CyD in A549 Cells (FR (-)). A549 cells were treated M-β-CyD for 2 h. Thereafter, cells were treated with PI or rhodamine 123, then the percentage of cells showing DNA content and mitochondrial transmembrane was quantified by flow cytometry. Each value represents the mean  $\pm$  S.E.M. of 3-4 experiments. \* $p < 0.05$ , compared with control.
